# Supplementary material for: One-step synthesis of high-purity fluorous-capped inorganic nanoparticles
Source: Royal Society of Chemistry journal article supplement (doi:10.1039/b927355g), 2010-01-01
Supplement: b927355g.pdf [file b927355g.pdf]

## **Electronic Supplementary Information**

# **One-step synthesis of high-purity fluorine-capped inorganic nanoparticles**

Rakesh Voggu,<sup>a</sup> Ajmala Shireen,<sup>a</sup> C. N. R. Rao\*<sup>a</sup>

*Chemistry and Physics of Materials Unit, New Chemistry Unit and CSIR Centre of Excellence in Chemistry, Jawaharlal Nehru Centre for Advanced Scientific Research, Jakkur P. O., Bangalore 560064, India.*

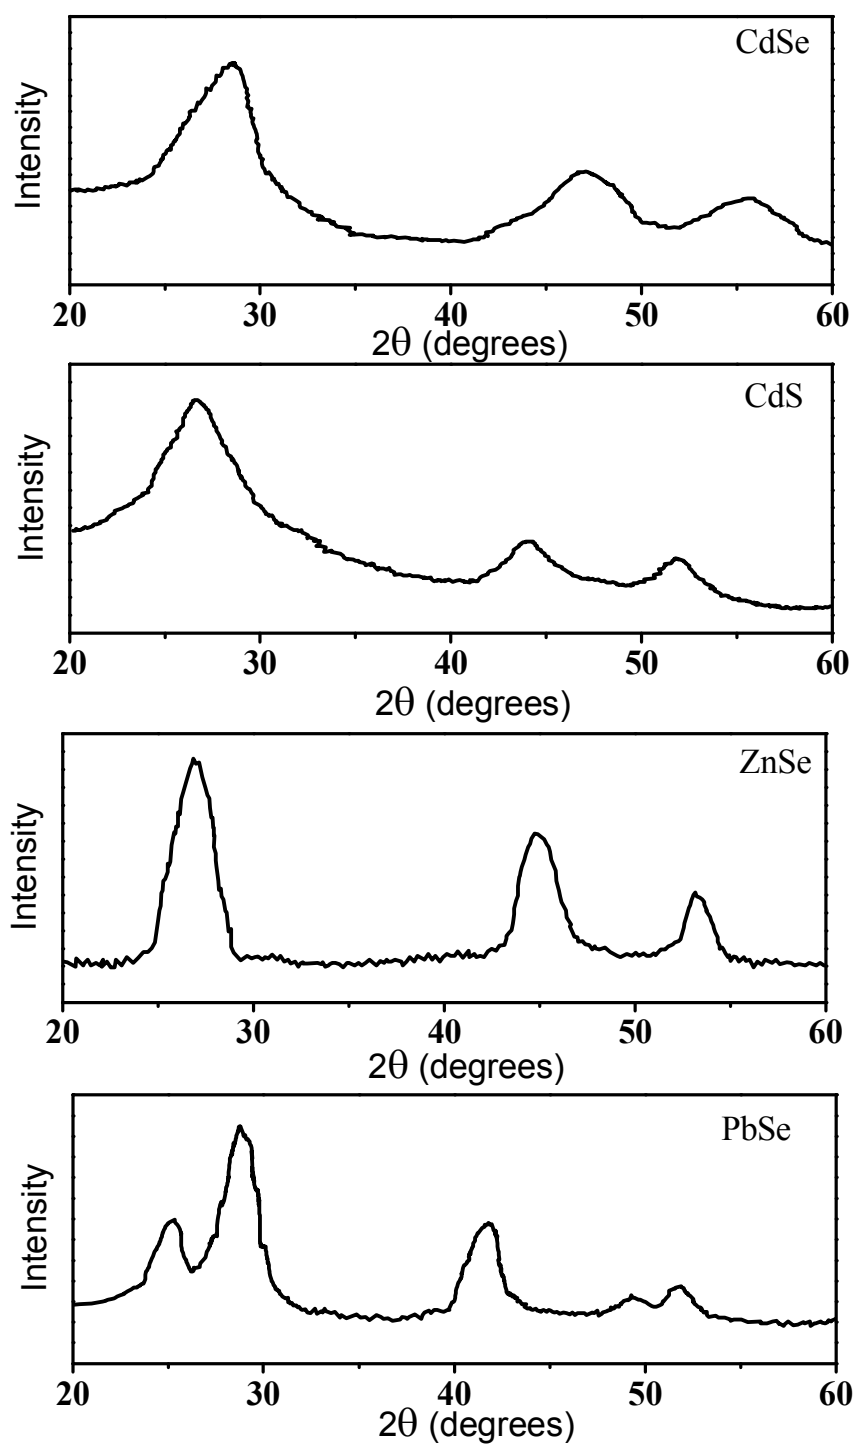

**Figure S1:** X-ray diffraction patterns of metal chalcogenides nanocrystals

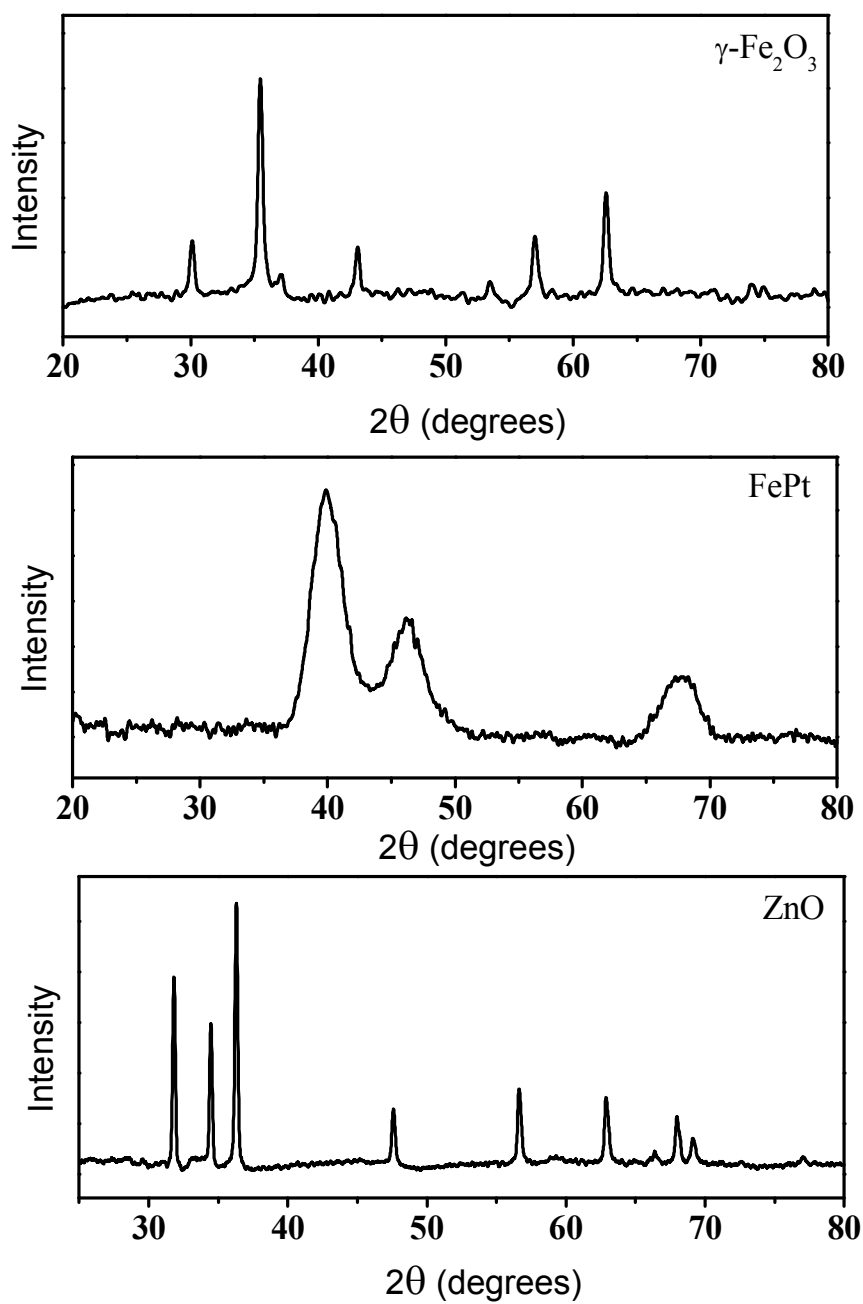

**Figure S2:** X-ray diffraction patterns of  $\gamma\text{-Fe}_2\text{O}_3$ , FePt and ZnO nanocrystals
